# Supplementary material for: Hitting the nail on the head: combining oncolytic adenovirus-mediated virotherapy and immunomodulation for the treatment of glioma
Source: PubMed Central journal article supplement (PMC5687697; doi:10.18632/oncotarget.20810), 2017-09-11
Supplement: oncotarget-08-89391-s001.pdf [file oncotarget-08-89391-s001.pdf]

# Hitting the nail on the head: combining oncolytic adenovirus-mediated virotherapy and immunomodulation for the treatment of glioma

## SUPPLEMENTARY MATERIALS

**Supplementary Table 1: Immunotherapy clinical trials in glioma.** See\_Supplementary\_Table 1
